# Supplementary material for: GATA3 Promotes the Neural Progenitor State but Not Neurogenesis in 3D Traumatic Injury Model of Primary Human Cortical Astrocytes
Source: Front Cell Neurosci. 2019 Feb 11;13:23. doi: 10.3389/fncel.2019.00023 (PMC6380212; doi:10.3389/fncel.2019.00023)
Supplement: DATASET S4 — GO-term analyses for GATA3-expressing and scratched pHAs versus EGFP-expressing and scratched pHAs in 2D cultures. [file Data_Sheet_4.ZIP]

Archive with 336 entries (325 files):
- GO_term_analyses_GATA3s_vs_GFPs/
- GO_term_analyses_GATA3s_vs_GFPs/.DS_Store
- __MACOSX/
- __MACOSX/GO_term_analyses_GATA3s_vs_GFPs/
- __MACOSX/GO_term_analyses_GATA3s_vs_GFPs/._.DS_Store
- GO_term_analyses_GATA3s_vs_GFPs/clusterProfiler/
- GO_term_analyses_GATA3s_vs_GFPs/clusterProfiler/clusterProfiler_keggGenes.xlsx
- __MACOSX/GO_term_analyses_GATA3s_vs_GFPs/clusterProfiler/
- __MACOSX/GO_term_analyses_GATA3s_vs_GFPs/clusterProfiler/._clusterProfiler_keggGenes.xlsx
- GO_term_analyses_GATA3s_vs_GFPs/clusterProfiler/CP_BP_genes.xlsx
- __MACOSX/GO_term_analyses_GATA3s_vs_GFPs/clusterProfiler/._CP_BP_genes.xlsx
- GO_term_analyses_GATA3s_vs_GFPs/clusterProfiler/CP_CC_genes.xlsx
- __MACOSX/GO_term_analyses_GATA3s_vs_GFPs/clusterProfiler/._CP_CC_genes.xlsx
- GO_term_analyses_GATA3s_vs_GFPs/clusterProfiler/CP_enrichGO_BP.pdf
- __MACOSX/GO_term_analyses_GATA3s_vs_GFPs/clusterProfiler/._CP_enrichGO_BP.pdf
- GO_term_analyses_GATA3s_vs_GFPs/clusterProfiler/CP_enrichGO_CC.pdf
- __MACOSX/GO_term_analyses_GATA3s_vs_GFPs/clusterProfiler/._CP_enrichGO_CC.pdf
- GO_term_analyses_GATA3s_vs_GFPs/clusterProfiler/CP_enrichGO_MF.pdf
- __MACOSX/GO_term_analyses_GATA3s_vs_GFPs/clusterProfiler/._CP_enrichGO_MF.pdf
- GO_term_analyses_GATA3s_vs_GFPs/clusterProfiler/CP_enrichKEGGS.pdf
- __MACOSX/GO_term_analyses_GATA3s_vs_GFPs/clusterProfiler/._CP_enrichKEGGS.pdf
- GO_term_analyses_GATA3s_vs_GFPs/clusterProfiler/CP_MF_genes.xlsx
- __MACOSX/GO_term_analyses_GATA3s_vs_GFPs/clusterProfiler/._CP_MF_genes.xlsx
- GO_term_analyses_GATA3s_vs_GFPs/clusterProfiler/hsa03320.PPARsignalingpathway.png
- __MACOSX/GO_term_analyses_GATA3s_vs_GFPs/clusterProfiler/._hsa03320.PPARsignalingpathway.png
- GO_term_analyses_GATA3s_vs_GFPs/clusterProfiler/hsa04060.Cytokine-cytokinereceptorinteraction.png
- __MACOSX/GO_term_analyses_GATA3s_vs_GFPs/clusterProfiler/._hsa04060.Cytokine-cytokinereceptorinteraction.png
- GO_term_analyses_GATA3s_vs_GFPs/clusterProfiler/hsa04080.Neuroactiveligand-receptorinteraction.png
- __MACOSX/GO_term_analyses_GATA3s_vs_GFPs/clusterProfiler/._hsa04080.Neuroactiveligand-receptorinteraction.png
- GO_term_analyses_GATA3s_vs_GFPs/clusterProfiler/hsa04151.PI3K-Aktsignalingpathway.png
- __MACOSX/GO_term_analyses_GATA3s_vs_GFPs/clusterProfiler/._hsa04151.PI3K-Aktsignalingpathway.png
- GO_term_analyses_GATA3s_vs_GFPs/clusterProfiler/hsa04270.Vascularsmoothmusclecontraction.png
- __MACOSX/GO_term_analyses_GATA3s_vs_GFPs/clusterProfiler/._hsa04270.Vascularsmoothmusclecontraction.png
- GO_term_analyses_GATA3s_vs_GFPs/clusterProfiler/hsa04350.TGF-betasignalingpathway.png
- __MACOSX/GO_term_analyses_GATA3s_vs_GFPs/clusterProfiler/._hsa04350.TGF-betasignalingpathway.png
- GO_term_analyses_GATA3s_vs_GFPs/clusterProfiler/hsa04360.Axonguidance.png
- __MACOSX/GO_term_analyses_GATA3s_vs_GFPs/clusterProfiler/._hsa04360.Axonguidance.png
- GO_term_analyses_GATA3s_vs_GFPs/clusterProfiler/hsa04390.Hipposignalingpathway.png
- __MACOSX/GO_term_analyses_GATA3s_vs_GFPs/clusterProfiler/._hsa04390.Hipposignalingpathway.png
- GO_term_analyses_GATA3s_vs_GFPs/clusterProfiler/hsa04510.Focaladhesion.png
- __MACOSX/GO_term_analyses_GATA3s_vs_GFPs/clusterProfiler/._hsa04510.Focaladhesion.png
- GO_term_analyses_GATA3s_vs_GFPs/clusterProfiler/hsa04512.ECM-receptorinteraction.png
- __MACOSX/GO_term_analyses_GATA3s_vs_GFPs/clusterProfiler/._hsa04512.ECM-receptorinteraction.png
- GO_term_analyses_GATA3s_vs_GFPs/clusterProfiler/hsa04514.Celladhesionmolecules(CAMs).png
- __MACOSX/GO_term_analyses_GATA3s_vs_GFPs/clusterProfiler/._hsa04514.Celladhesionmolecules(CAMs).png
- GO_term_analyses_GATA3s_vs_GFPs/clusterProfiler/hsa04550.Signalingpathwaysregulatingpluripotencyofstemcells.png
- __MACOSX/GO_term_analyses_GATA3s_vs_GFPs/clusterProfiler/._hsa04550.Signalingpathwaysregulatingpluripotencyofstemcells.png
- GO_term_analyses_GATA3s_vs_GFPs/clusterProfiler/hsa04611.Plateletactivation.png
- __MACOSX/GO_term_analyses_GATA3s_vs_GFPs/clusterProfiler/._hsa04611.Plateletactivation.png
- GO_term_analyses_GATA3s_vs_GFPs/clusterProfiler/hsa04670.Leukocytetransendothelialmigration.png
- __MACOSX/GO_term_analyses_GATA3s_vs_GFPs/clusterProfiler/._hsa04670.Leukocytetransendothelialmigration.png
- GO_term_analyses_GATA3s_vs_GFPs/clusterProfiler/hsa04724.Glutamatergicsynapse.png
- __MACOSX/GO_term_analyses_GATA3s_vs_GFPs/clusterProfiler/._hsa04724.Glutamatergicsynapse.png
- GO_term_analyses_GATA3s_vs_GFPs/clusterProfiler/hsa04726.Serotonergicsynapse.png
- __MACOSX/GO_term_analyses_GATA3s_vs_GFPs/clusterProfiler/._hsa04726.Serotonergicsynapse.png
- GO_term_analyses_GATA3s_vs_GFPs/clusterProfiler/hsa04730.Long-termdepression.png
- __MACOSX/GO_term_analyses_GATA3s_vs_GFPs/clusterProfiler/._hsa04730.Long-termdepression.png
- GO_term_analyses_GATA3s_vs_GFPs/clusterProfiler/hsa04921.Oxytocinsignalingpathway.png
- __MACOSX/GO_term_analyses_GATA3s_vs_GFPs/clusterProfiler/._hsa04921.Oxytocinsignalingpathway.png
- GO_term_analyses_GATA3s_vs_GFPs/clusterProfiler/hsa04926.Relaxinsignalingpathway.png
- __MACOSX/GO_term_analyses_GATA3s_vs_GFPs/clusterProfiler/._hsa04926.Relaxinsignalingpathway.png
- GO_term_analyses_GATA3s_vs_GFPs/clusterProfiler/hsa04933.AGE-RAGEsignalingpathwayindiabeticcomplications.png
- __MACOSX/GO_term_analyses_GATA3s_vs_GFPs/clusterProfiler/._hsa04933.AGE-RAGEsignalingpathwayindiabeticcomplications.png
- GO_term_analyses_GATA3s_vs_GFPs/clusterProfiler/hsa04974.Proteindigestionandabsorption.png
- __MACOSX/GO_term_analyses_GATA3s_vs_GFPs/clusterProfiler/._hsa04974.Proteindigestionandabsorption.png
- GO_term_analyses_GATA3s_vs_GFPs/clusterProfiler/hsa05142.Chagasdisease(Americantrypanosomiasis).png
- __MACOSX/GO_term_analyses_GATA3s_vs_GFPs/clusterProfiler/._hsa05142.Chagasdisease(Americantrypanosomiasis).png
- GO_term_analyses_GATA3s_vs_GFPs/clusterProfiler/hsa05144.Malaria.png
- __MACOSX/GO_term_analyses_GATA3s_vs_GFPs/clusterProfiler/._hsa05144.Malaria.png
- GO_term_analyses_GATA3s_vs_GFPs/clusterProfiler/hsa05146.Amoebiasis.png
- __MACOSX/GO_term_analyses_GATA3s_vs_GFPs/clusterProfiler/._hsa05146.Amoebiasis.png
- GO_term_analyses_GATA3s_vs_GFPs/clusterProfiler/hsa05165.Humanpapillomavirusinfection.png
- __MACOSX/GO_term_analyses_GATA3s_vs_GFPs/clusterProfiler/._hsa05165.Humanpapillomavirusinfection.png
- GO_term_analyses_GATA3s_vs_GFPs/clusterProfiler/hsa05205.Proteoglycansincancer.png
- __MACOSX/GO_term_analyses_GATA3s_vs_GFPs/clusterProfiler/._hsa05205.Proteoglycansincancer.png
- GO_term_analyses_GATA3s_vs_GFPs/clusterProfiler/hsa05217.Basalcellcarcinoma.png
- __MACOSX/GO_term_analyses_GATA3s_vs_GFPs/clusterProfiler/._hsa05217.Basalcellcarcinoma.png
- GO_term_analyses_GATA3s_vs_GFPs/clusterProfiler/hsa05410.Hypertrophiccardiomyopathy(HCM).png
- __MACOSX/GO_term_analyses_GATA3s_vs_GFPs/clusterProfiler/._hsa05410.Hypertrophiccardiomyopathy(HCM).png
- GO_term_analyses_GATA3s_vs_GFPs/clusterProfiler/hsa05412.Arrhythmogenicrightventricularcardiomyopathy(ARVC).png
- __MACOSX/GO_term_analyses_GATA3s_vs_GFPs/clusterProfiler/._hsa05412.Arrhythmogenicrightventricularcardiomyopathy(ARVC).png
- GO_term_analyses_GATA3s_vs_GFPs/clusterProfiler/hsa05414.Dilatedcardiomyopathy(DCM).png
- __MACOSX/GO_term_analyses_GATA3s_vs_GFPs/clusterProfiler/._hsa05414.Dilatedcardiomyopathy(DCM).png
- GO_term_analyses_GATA3s_vs_GFPs/clusterProfiler/pVal_CP_enrichGO_BP.pdf
- __MACOSX/GO_term_analyses_GATA3s_vs_GFPs/clusterProfiler/._pVal_CP_enrichGO_BP.pdf
- GO_term_analyses_GATA3s_vs_GFPs/clusterProfiler/pVal_CP_enrichGO_CC.pdf
- __MACOSX/GO_term_analyses_GATA3s_vs_GFPs/clusterProfiler/._pVal_CP_enrichGO_CC.pdf
- GO_term_analyses_GATA3s_vs_GFPs/clusterProfiler/pVal_CP_enrichGO_MF.pdf
- __MACOSX/GO_term_analyses_GATA3s_vs_GFPs/clusterProfiler/._pVal_CP_enrichGO_MF.pdf
- GO_term_analyses_GATA3s_vs_GFPs/clusterProfiler/pVal_CP_enrichKEGGS.pdf
- __MACOSX/GO_term_analyses_GATA3s_vs_GFPs/clusterProfiler/._pVal_CP_enrichKEGGS.pdf
- __MACOSX/GO_term_analyses_GATA3s_vs_GFPs/._clusterProfiler
- GO_term_analyses_GATA3s_vs_GFPs/GOSeq/
- GO_term_analyses_GATA3s_vs_GFPs/GOSeq/.DS_Store
- __MACOSX/GO_term_analyses_GATA3s_vs_GFPs/GOSeq/
- __MACOSX/GO_term_analyses_GATA3s_vs_GFPs/GOSeq/._.DS_Store
- GO_term_analyses_GATA3s_vs_GFPs/GOSeq/GOSeq_keggGenes_GATA3c_vs_GFPc.xlsx
- __MACOSX/GO_term_analyses_GATA3s_vs_GFPs/GOSeq/._GOSeq_keggGenes_GATA3c_vs_GFPc.xlsx
- GO_term_analyses_GATA3s_vs_GFPs/GOSeq/hsa00230.Purinemetabolism.png
- __MACOSX/GO_term_analyses_GATA3s_vs_GFPs/GOSeq/._hsa00230.Purinemetabolism.png
- GO_term_analyses_GATA3s_vs_GFPs/GOSeq/hsa02010.ABCtransporters.png
- __MACOSX/GO_term_analyses_GATA3s_vs_GFPs/GOSeq/._hsa02010.ABCtransporters.png
- GO_term_analyses_GATA3s_vs_GFPs/GOSeq/hsa04010.MAPKsignalingpathway.png
- __MACOSX/GO_term_analyses_GATA3s_vs_GFPs/GOSeq/._hsa04010.MAPKsignalingpathway.png
- GO_term_analyses_GATA3s_vs_GFPs/GOSeq/hsa04080.Neuroactiveligand-receptorinteraction.png
- __MACOSX/GO_term_analyses_GATA3s_vs_GFPs/GOSeq/._hsa04080.Neuroactiveligand-receptorinteraction.png
- GO_term_analyses_GATA3s_vs_GFPs/GOSeq/hsa04144.Endocytosis.png
- __MACOSX/GO_term_analyses_GATA3s_vs_GFPs/GOSeq/._hsa04144.Endocytosis.png
- GO_term_analyses_GATA3s_vs_GFPs/GOSeq/hsa04145.Phagosome.png
- __MACOSX/GO_term_analyses_GATA3s_vs_GFPs/GOSeq/._hsa04145.Phagosome.png
- GO_term_analyses_GATA3s_vs_GFPs/GOSeq/hsa04260.Cardiacmusclecontraction.png
- __MACOSX/GO_term_analyses_GATA3s_vs_GFPs/GOSeq/._hsa04260.Cardiacmusclecontraction.png
- GO_term_analyses_GATA3s_vs_GFPs/GOSeq/hsa04270.Vascularsmoothmusclecontraction.png
- __MACOSX/GO_term_analyses_GATA3s_vs_GFPs/GOSeq/._hsa04270.Vascularsmoothmusclecontraction.png
- GO_term_analyses_GATA3s_vs_GFPs/GOSeq/hsa04310.Wntsignalingpathway.png
- __MACOSX/GO_term_analyses_GATA3s_vs_GFPs/GOSeq/._hsa04310.Wntsignalingpathway.png
- GO_term_analyses_GATA3s_vs_GFPs/GOSeq/hsa04340.Hedgehogsignalingpathway.png
- __MACOSX/GO_term_analyses_GATA3s_vs_GFPs/GOSeq/._hsa04340.Hedgehogsignalingpathway.png
- GO_term_analyses_GATA3s_vs_GFPs/GOSeq/hsa04350.TGF-betasignalingpathway.png
- __MACOSX/GO_term_analyses_GATA3s_vs_GFPs/GOSeq/._hsa04350.TGF-betasignalingpathway.png
- GO_term_analyses_GATA3s_vs_GFPs/GOSeq/hsa04360.Axonguidance.png
- __MACOSX/GO_term_analyses_GATA3s_vs_GFPs/GOSeq/._hsa04360.Axonguidance.png
- GO_term_analyses_GATA3s_vs_GFPs/GOSeq/hsa04510.Focaladhesion.png
- __MACOSX/GO_term_analyses_GATA3s_vs_GFPs/GOSeq/._hsa04510.Focaladhesion.png
- GO_term_analyses_GATA3s_vs_GFPs/GOSeq/hsa04512.ECM-receptorinteraction.png
- __MACOSX/GO_term_analyses_GATA3s_vs_GFPs/GOSeq/._hsa04512.ECM-receptorinteraction.png
- GO_term_analyses_GATA3s_vs_GFPs/GOSeq/hsa04514.Celladhesionmolecules(CAMs).png
- __MACOSX/GO_term_analyses_GATA3s_vs_GFPs/GOSeq/._hsa04514.Celladhesionmolecules(CAMs).png
- GO_term_analyses_GATA3s_vs_GFPs/GOSeq/hsa04530.Tightjunction.png
- __MACOSX/GO_term_analyses_GATA3s_vs_GFPs/GOSeq/._hsa04530.Tightjunction.png
- GO_term_analyses_GATA3s_vs_GFPs/GOSeq/hsa04540.Gapjunction.png
- __MACOSX/GO_term_analyses_GATA3s_vs_GFPs/GOSeq/._hsa04540.Gapjunction.png
- GO_term_analyses_GATA3s_vs_GFPs/GOSeq/hsa04610.Complementandcoagulationcascades.png
- __MACOSX/GO_term_analyses_GATA3s_vs_GFPs/GOSeq/._hsa04610.Complementandcoagulationcascades.png
- GO_term_analyses_GATA3s_vs_GFPs/GOSeq/hsa04612.Antigenprocessingandpresentation.png
- __MACOSX/GO_term_analyses_GATA3s_vs_GFPs/GOSeq/._hsa04612.Antigenprocessingandpresentation.png
- GO_term_analyses_GATA3s_vs_GFPs/GOSeq/hsa04650.Naturalkillercellmediatedcytotoxicity.png
- __MACOSX/GO_term_analyses_GATA3s_vs_GFPs/GOSeq/._hsa04650.Naturalkillercellmediatedcytotoxicity.png
- GO_term_analyses_GATA3s_vs_GFPs/GOSeq/hsa04670.Leukocytetransendothelialmigration.png
- __MACOSX/GO_term_analyses_GATA3s_vs_GFPs/GOSeq/._hsa04670.Leukocytetransendothelialmigration.png
- GO_term_analyses_GATA3s_vs_GFPs/GOSeq/hsa04730.Long-termdepression.png
- __MACOSX/GO_term_analyses_GATA3s_vs_GFPs/GOSeq/._hsa04730.Long-termdepression.png
- GO_term_analyses_GATA3s_vs_GFPs/GOSeq/hsa04810.Regulationofactincytoskeleton.png
- __MACOSX/GO_term_analyses_GATA3s_vs_GFPs/GOSeq/._hsa04810.Regulationofactincytoskeleton.png
- GO_term_analyses_GATA3s_vs_GFPs/GOSeq/hsa04916.Melanogenesis.png
- __MACOSX/GO_term_analyses_GATA3s_vs_GFPs/GOSeq/._hsa04916.Melanogenesis.png
- GO_term_analyses_GATA3s_vs_GFPs/GOSeq/hsa04940.TypeIdiabetesmellitus.png
- __MACOSX/GO_term_analyses_GATA3s_vs_GFPs/GOSeq/._hsa04940.TypeIdiabetesmellitus.png
- GO_term_analyses_GATA3s_vs_GFPs/GOSeq/hsa04970.Salivarysecretion.png
- __MACOSX/GO_term_analyses_GATA3s_vs_GFPs/GOSeq/._hsa04970.Salivarysecretion.png
- GO_term_analyses_GATA3s_vs_GFPs/GOSeq/hsa04974.Proteindigestionandabsorption.png
- __MACOSX/GO_term_analyses_GATA3s_vs_GFPs/GOSeq/._hsa04974.Proteindigestionandabsorption.png
- GO_term_analyses_GATA3s_vs_GFPs/GOSeq/hsa04976.Bilesecretion.png
- __MACOSX/GO_term_analyses_GATA3s_vs_GFPs/GOSeq/._hsa04976.Bilesecretion.png
- GO_term_analyses_GATA3s_vs_GFPs/GOSeq/hsa05020.Priondiseases.png
- __MACOSX/GO_term_analyses_GATA3s_vs_GFPs/GOSeq/._hsa05020.Priondiseases.png
- GO_term_analyses_GATA3s_vs_GFPs/GOSeq/hsa05146.Amoebiasis.png
- __MACOSX/GO_term_analyses_GATA3s_vs_GFPs/GOSeq/._hsa05146.Amoebiasis.png
- GO_term_analyses_GATA3s_vs_GFPs/GOSeq/hsa05160.HepatitisC.png
- __MACOSX/GO_term_analyses_GATA3s_vs_GFPs/GOSeq/._hsa05160.HepatitisC.png
- GO_term_analyses_GATA3s_vs_GFPs/GOSeq/hsa05200.Pathwaysincancer.png
- __MACOSX/GO_term_analyses_GATA3s_vs_GFPs/GOSeq/._hsa05200.Pathwaysincancer.png
- GO_term_analyses_GATA3s_vs_GFPs/GOSeq/hsa05217.Basalcellcarcinoma.png
- __MACOSX/GO_term_analyses_GATA3s_vs_GFPs/GOSeq/._hsa05217.Basalcellcarcinoma.png
- GO_term_analyses_GATA3s_vs_GFPs/GOSeq/hsa05218.Melanoma.png
- __MACOSX/GO_term_analyses_GATA3s_vs_GFPs/GOSeq/._hsa05218.Melanoma.png
- GO_term_analyses_GATA3s_vs_GFPs/GOSeq/hsa05219.Bladdercancer.png
- __MACOSX/GO_term_analyses_GATA3s_vs_GFPs/GOSeq/._hsa05219.Bladdercancer.png
- GO_term_analyses_GATA3s_vs_GFPs/GOSeq/hsa05222.Smallcelllungcancer.png
- __MACOSX/GO_term_analyses_GATA3s_vs_GFPs/GOSeq/._hsa05222.Smallcelllungcancer.png
- GO_term_analyses_GATA3s_vs_GFPs/GOSeq/hsa05320.Autoimmunethyroiddisease.png
- __MACOSX/GO_term_analyses_GATA3s_vs_GFPs/GOSeq/._hsa05320.Autoimmunethyroiddisease.png
- GO_term_analyses_GATA3s_vs_GFPs/GOSeq/hsa05322.Systemiclupuserythematosus.png
- __MACOSX/GO_term_analyses_GATA3s_vs_GFPs/GOSeq/._hsa05322.Systemiclupuserythematosus.png
- GO_term_analyses_GATA3s_vs_GFPs/GOSeq/hsa05330.Allograftrejection.png
- __MACOSX/GO_term_analyses_GATA3s_vs_GFPs/GOSeq/._hsa05330.Allograftrejection.png
- GO_term_analyses_GATA3s_vs_GFPs/GOSeq/hsa05332.Graft-versus-hostdisease.png
- __MACOSX/GO_term_analyses_GATA3s_vs_GFPs/GOSeq/._hsa05332.Graft-versus-hostdisease.png
- GO_term_analyses_GATA3s_vs_GFPs/GOSeq/hsa05410.Hypertrophiccardiomyopathy(HCM).png
- __MACOSX/GO_term_analyses_GATA3s_vs_GFPs/GOSeq/._hsa05410.Hypertrophiccardiomyopathy(HCM).png
- GO_term_analyses_GATA3s_vs_GFPs/GOSeq/hsa05412.Arrhythmogenicrightventricularcardiomyopathy(ARVC).png
- __MACOSX/GO_term_analyses_GATA3s_vs_GFPs/GOSeq/._hsa05412.Arrhythmogenicrightventricularcardiomyopathy(ARVC).png
- GO_term_analyses_GATA3s_vs_GFPs/GOSeq/hsa05414.Dilatedcardiomyopathy.png
- __MACOSX/GO_term_analyses_GATA3s_vs_GFPs/GOSeq/._hsa05414.Dilatedcardiomyopathy.png
- GO_term_analyses_GATA3s_vs_GFPs/GOSeq/hsa05416.Viralmyocarditis.png
- __MACOSX/GO_term_analyses_GATA3s_vs_GFPs/GOSeq/._hsa05416.Viralmyocarditis.png
- GO_term_analyses_GATA3s_vs_GFPs/GOSeq/KEGG_adjusted.GO.kegg.Over.BH.pdf
- __MACOSX/GO_term_analyses_GATA3s_vs_GFPs/GOSeq/._KEGG_adjusted.GO.kegg.Over.BH.pdf
- GO_term_analyses_GATA3s_vs_GFPs/GOSeq/pVal_KEGG_adjusted.GO.kegg.Over.BH.pdf
- __MACOSX/GO_term_analyses_GATA3s_vs_GFPs/GOSeq/._pVal_KEGG_adjusted.GO.kegg.Over.BH.pdf
- __MACOSX/GO_term_analyses_GATA3s_vs_GFPs/._GOSeq
- GO_term_analyses_GATA3s_vs_GFPs/GOstats/
- GO_term_analyses_GATA3s_vs_GFPs/GOstats/.DS_Store
- __MACOSX/GO_term_analyses_GATA3s_vs_GFPs/GOstats/
- __MACOSX/GO_term_analyses_GATA3s_vs_GFPs/GOstats/._.DS_Store
- GO_term_analyses_GATA3s_vs_GFPs/GOstats/GOstats_BP_Down_pieChart.pdf
- __MACOSX/GO_term_analyses_GATA3s_vs_GFPs/GOstats/._GOstats_BP_Down_pieChart.pdf
- GO_term_analyses_GATA3s_vs_GFPs/GOstats/GOstats_BP_Up_pieChart.pdf
- __MACOSX/GO_term_analyses_GATA3s_vs_GFPs/GOstats/._GOstats_BP_Up_pieChart.pdf
- GO_term_analyses_GATA3s_vs_GFPs/GOstats/GOstats_CC_Down_pieChart.pdf
- __MACOSX/GO_term_analyses_GATA3s_vs_GFPs/GOstats/._GOstats_CC_Down_pieChart.pdf
- GO_term_analyses_GATA3s_vs_GFPs/GOstats/GOstats_CC_Up_pieChart.pdf
- __MACOSX/GO_term_analyses_GATA3s_vs_GFPs/GOstats/._GOstats_CC_Up_pieChart.pdf
- GO_term_analyses_GATA3s_vs_GFPs/GOstats/GOstats_kegg_Under.pdf
- __MACOSX/GO_term_analyses_GATA3s_vs_GFPs/GOstats/._GOstats_kegg_Under.pdf
- GO_term_analyses_GATA3s_vs_GFPs/GOstats/GOstats_kegg_Up.pdf
- __MACOSX/GO_term_analyses_GATA3s_vs_GFPs/GOstats/._GOstats_kegg_Up.pdf
- GO_term_analyses_GATA3s_vs_GFPs/GOstats/GOstats_keggGenes.xlsx
- __MACOSX/GO_term_analyses_GATA3s_vs_GFPs/GOstats/._GOstats_keggGenes.xlsx
- GO_term_analyses_GATA3s_vs_GFPs/GOstats/GOstats_MF_Down_pieChart.pdf
- __MACOSX/GO_term_analyses_GATA3s_vs_GFPs/GOstats/._GOstats_MF_Down_pieChart.pdf
- GO_term_analyses_GATA3s_vs_GFPs/GOstats/GOstats_MF_Up_pieChart.pdf
- __MACOSX/GO_term_analyses_GATA3s_vs_GFPs/GOstats/._GOstats_MF_Up_pieChart.pdf
- GO_term_analyses_GATA3s_vs_GFPs/GOstats/hsa00260.Glycine,serineandthreoninemetabolism.png
- __MACOSX/GO_term_analyses_GATA3s_vs_GFPs/GOstats/._hsa00260.Glycine,serineandthreoninemetabolism.png
- GO_term_analyses_GATA3s_vs_GFPs/GOstats/hsa02010.ABCtransporters.png
- __MACOSX/GO_term_analyses_GATA3s_vs_GFPs/GOstats/._hsa02010.ABCtransporters.png
- GO_term_analyses_GATA3s_vs_GFPs/GOstats/hsa03320.PPARsignalingpathway.png
- __MACOSX/GO_term_analyses_GATA3s_vs_GFPs/GOstats/._hsa03320.PPARsignalingpathway.png
- GO_term_analyses_GATA3s_vs_GFPs/GOstats/hsa04020.Calciumsignalingpathway.png
- __MACOSX/GO_term_analyses_GATA3s_vs_GFPs/GOstats/._hsa04020.Calciumsignalingpathway.png
- GO_term_analyses_GATA3s_vs_GFPs/GOstats/hsa04060.Cytokine-cytokinereceptorinteraction.png
- __MACOSX/GO_term_analyses_GATA3s_vs_GFPs/GOstats/._hsa04060.Cytokine-cytokinereceptorinteraction.png
- GO_term_analyses_GATA3s_vs_GFPs/GOstats/hsa04080.Neuroactiveligand-receptorinteraction.png
- __MACOSX/GO_term_analyses_GATA3s_vs_GFPs/GOstats/._hsa04080.Neuroactiveligand-receptorinteraction.png
- GO_term_analyses_GATA3s_vs_GFPs/GOstats/hsa04145.Phagosome.png
- __MACOSX/GO_term_analyses_GATA3s_vs_GFPs/GOstats/._hsa04145.Phagosome.png
- GO_term_analyses_GATA3s_vs_GFPs/GOstats/hsa04270.Vascularsmoothmusclecontraction.png
- __MACOSX/GO_term_analyses_GATA3s_vs_GFPs/GOstats/._hsa04270.Vascularsmoothmusclecontraction.png
- GO_term_analyses_GATA3s_vs_GFPs/GOstats/hsa04340.Hedgehogsignalingpathway.png
- __MACOSX/GO_term_analyses_GATA3s_vs_GFPs/GOstats/._hsa04340.Hedgehogsignalingpathway.png
- GO_term_analyses_GATA3s_vs_GFPs/GOstats/hsa04350.TGF-betasignalingpathway.png
- __MACOSX/GO_term_analyses_GATA3s_vs_GFPs/GOstats/._hsa04350.TGF-betasignalingpathway.png
- GO_term_analyses_GATA3s_vs_GFPs/GOstats/hsa04360.Axonguidance.png
- __MACOSX/GO_term_analyses_GATA3s_vs_GFPs/GOstats/._hsa04360.Axonguidance.png
- GO_term_analyses_GATA3s_vs_GFPs/GOstats/hsa04510.Focaladhesion.png
- __MACOSX/GO_term_analyses_GATA3s_vs_GFPs/GOstats/._hsa04510.Focaladhesion.png
- GO_term_analyses_GATA3s_vs_GFPs/GOstats/hsa04512.ECM-receptorinteraction.png
- __MACOSX/GO_term_analyses_GATA3s_vs_GFPs/GOstats/._hsa04512.ECM-receptorinteraction.png
- GO_term_analyses_GATA3s_vs_GFPs/GOstats/hsa04514.Celladhesionmolecules(CAMs).png
- __MACOSX/GO_term_analyses_GATA3s_vs_GFPs/GOstats/._hsa04514.Celladhesionmolecules(CAMs).png
- GO_term_analyses_GATA3s_vs_GFPs/GOstats/hsa04640.Hematopoieticcelllineage.png
- __MACOSX/GO_term_analyses_GATA3s_vs_GFPs/GOstats/._hsa04640.Hematopoieticcelllineage.png
- GO_term_analyses_GATA3s_vs_GFPs/GOstats/hsa04670.Leukocytetransendothelialmigration.png
- __MACOSX/GO_term_analyses_GATA3s_vs_GFPs/GOstats/._hsa04670.Leukocytetransendothelialmigration.png
- GO_term_analyses_GATA3s_vs_GFPs/GOstats/hsa04730.Long-termdepression.png
- __MACOSX/GO_term_analyses_GATA3s_vs_GFPs/GOstats/._hsa04730.Long-termdepression.png
- GO_term_analyses_GATA3s_vs_GFPs/GOstats/hsa04810.Regulationofactincytoskeleton.png
- __MACOSX/GO_term_analyses_GATA3s_vs_GFPs/GOstats/._hsa04810.Regulationofactincytoskeleton.png
- GO_term_analyses_GATA3s_vs_GFPs/GOstats/hsa04940.TypeIdiabetesmellitus.png
- __MACOSX/GO_term_analyses_GATA3s_vs_GFPs/GOstats/._hsa04940.TypeIdiabetesmellitus.png
- GO_term_analyses_GATA3s_vs_GFPs/GOstats/hsa04974.Proteindigestionandabsorption.png
- __MACOSX/GO_term_analyses_GATA3s_vs_GFPs/GOstats/._hsa04974.Proteindigestionandabsorption.png
- GO_term_analyses_GATA3s_vs_GFPs/GOstats/hsa05142.Chagasdisease(Americantrypanosomiasis).png
- __MACOSX/GO_term_analyses_GATA3s_vs_GFPs/GOstats/._hsa05142.Chagasdisease(Americantrypanosomiasis).png
- GO_term_analyses_GATA3s_vs_GFPs/GOstats/hsa05144.Malaria.png
- __MACOSX/GO_term_analyses_GATA3s_vs_GFPs/GOstats/._hsa05144.Malaria.png
- GO_term_analyses_GATA3s_vs_GFPs/GOstats/hsa05146.Amoebiasis.png
- __MACOSX/GO_term_analyses_GATA3s_vs_GFPs/GOstats/._hsa05146.Amoebiasis.png
- GO_term_analyses_GATA3s_vs_GFPs/GOstats/hsa05200.Pathwaysincancer.png
- __MACOSX/GO_term_analyses_GATA3s_vs_GFPs/GOstats/._hsa05200.Pathwaysincancer.png
- GO_term_analyses_GATA3s_vs_GFPs/GOstats/hsa05217.Basalcellcarcinoma.png
- __MACOSX/GO_term_analyses_GATA3s_vs_GFPs/GOstats/._hsa05217.Basalcellcarcinoma.png
- GO_term_analyses_GATA3s_vs_GFPs/GOstats/hsa05222.Smallcelllungcancer.png
- __MACOSX/GO_term_analyses_GATA3s_vs_GFPs/GOstats/._hsa05222.Smallcelllungcancer.png
- GO_term_analyses_GATA3s_vs_GFPs/GOstats/hsa05323.Rheumatoidarthritis.png
- __MACOSX/GO_term_analyses_GATA3s_vs_GFPs/GOstats/._hsa05323.Rheumatoidarthritis.png
- GO_term_analyses_GATA3s_vs_GFPs/GOstats/hsa05330.Allograftrejection.png
- __MACOSX/GO_term_analyses_GATA3s_vs_GFPs/GOstats/._hsa05330.Allograftrejection.png
- GO_term_analyses_GATA3s_vs_GFPs/GOstats/hsa05410.Hypertrophiccardiomyopathy(HCM).png
- __MACOSX/GO_term_analyses_GATA3s_vs_GFPs/GOstats/._hsa05410.Hypertrophiccardiomyopathy(HCM).png
- GO_term_analyses_GATA3s_vs_GFPs/GOstats/hsa05412.Arrhythmogenicrightventricularcardiomyopathy(ARVC).png
- __MACOSX/GO_term_analyses_GATA3s_vs_GFPs/GOstats/._hsa05412.Arrhythmogenicrightventricularcardiomyopathy(ARVC).png
- GO_term_analyses_GATA3s_vs_GFPs/GOstats/hsa05414.Dilatedcardiomyopathy.png
- __MACOSX/GO_term_analyses_GATA3s_vs_GFPs/GOstats/._hsa05414.Dilatedcardiomyopathy.png
- GO_term_analyses_GATA3s_vs_GFPs/GOstats/pVal_GOstats_BP_Down_pieChart.pdf
- __MACOSX/GO_term_analyses_GATA3s_vs_GFPs/GOstats/._pVal_GOstats_BP_Down_pieChart.pdf
- GO_term_analyses_GATA3s_vs_GFPs/GOstats/pVal_GOstats_BP_Up_pieChart.pdf
- __MACOSX/GO_term_analyses_GATA3s_vs_GFPs/GOstats/._pVal_GOstats_BP_Up_pieChart.pdf
- GO_term_analyses_GATA3s_vs_GFPs/GOstats/pVal_GOstats_CC_Down_pieChart.pdf
- __MACOSX/GO_term_analyses_GATA3s_vs_GFPs/GOstats/._pVal_GOstats_CC_Down_pieChart.pdf
- GO_term_analyses_GATA3s_vs_GFPs/GOstats/pVal_GOstats_CC_Up_pieChart.pdf
- __MACOSX/GO_term_analyses_GATA3s_vs_GFPs/GOstats/._pVal_GOstats_CC_Up_pieChart.pdf
- GO_term_analyses_GATA3s_vs_GFPs/GOstats/pVal_GOstats_kegg_Under.pdf
- __MACOSX/GO_term_analyses_GATA3s_vs_GFPs/GOstats/._pVal_GOstats_kegg_Under.pdf
- GO_term_analyses_GATA3s_vs_GFPs/GOstats/pVal_GOstats_kegg_Up.pdf
- __MACOSX/GO_term_analyses_GATA3s_vs_GFPs/GOstats/._pVal_GOstats_kegg_Up.pdf
- GO_term_analyses_GATA3s_vs_GFPs/GOstats/pVal_GOstats_MF_Down_pieChart.pdf
- __MACOSX/GO_term_analyses_GATA3s_vs_GFPs/GOstats/._pVal_GOstats_MF_Down_pieChart.pdf
- GO_term_analyses_GATA3s_vs_GFPs/GOstats/pVal_GOstats_MF_Up_pieChart.pdf
- __MACOSX/GO_term_analyses_GATA3s_vs_GFPs/GOstats/._pVal_GOstats_MF_Up_pieChart.pdf
- __MACOSX/GO_term_analyses_GATA3s_vs_GFPs/._GOstats
- GO_term_analyses_GATA3s_vs_GFPs/topGO/
- GO_term_analyses_GATA3s_vs_GFPs/topGO/.DS_Store
- __MACOSX/GO_term_analyses_GATA3s_vs_GFPs/topGO/
- __MACOSX/GO_term_analyses_GATA3s_vs_GFPs/topGO/._.DS_Store
- GO_term_analyses_GATA3s_vs_GFPs/topGO/pVal_topGO_BP_classicfisher_pieChart.pdf
- __MACOSX/GO_term_analyses_GATA3s_vs_GFPs/topGO/._pVal_topGO_BP_classicfisher_pieChart.pdf
- GO_term_analyses_GATA3s_vs_GFPs/topGO/pVal_topGO_BP_elimfisher_pieChart.pdf
- __MACOSX/GO_term_analyses_GATA3s_vs_GFPs/topGO/._pVal_topGO_BP_elimfisher_pieChart.pdf
[truncated: 36 more entries]
