# Supplementary material for: GATA3 Promotes the Neural Progenitor State but Not Neurogenesis in 3D Traumatic Injury Model of Primary Human Cortical Astrocytes
Source: Front Cell Neurosci. 2019 Feb 11;13:23. doi: 10.3389/fncel.2019.00023 (PMC6380212; doi:10.3389/fncel.2019.00023)
Supplement: DATASET S4 — GO-term analyses for GATA3-expressing and scratched pHAs versus EGFP-expressing and scratched pHAs in 2D cultures. [file Data_Sheet_4.ZIP › GO_term_analyses_GATA3s_vs_GFPs/clusterProfiler/clusterProfiler_keggGenes.xlsx]

## Sheet: hsa04512
geneIds

## Sheet: hsa04514
geneIds

## Sheet: hsa04510
geneIds

## Sheet: hsa04974
geneIds

## Sheet: hsa05144
geneIds

## Sheet: hsa04360
geneIds

## Sheet: hsa05414
geneIds

## Sheet: hsa05410
geneIds

## Sheet: hsa04080
geneIds

## Sheet: hsa05146
geneIds

[truncated: 9 more sheets: hsa05217, hsa04060, hsa05412, hsa05142, hsa04730, hsa03320, hsa04270, hsa04670, hsa04350]
