# Supplementary material for: GATA3 Promotes the Neural Progenitor State but Not Neurogenesis in 3D Traumatic Injury Model of Primary Human Cortical Astrocytes
Source: Front Cell Neurosci. 2019 Feb 11;13:23. doi: 10.3389/fncel.2019.00023 (PMC6380212; doi:10.3389/fncel.2019.00023)
Supplement: DATASET S4 — GO-term analyses for GATA3-expressing and scratched pHAs versus EGFP-expressing and scratched pHAs in 2D cultures. [file Data_Sheet_4.ZIP › GO_term_analyses_GATA3s_vs_GFPs/clusterProfiler/CP_BP_genes.xlsx]

## Sheet: GO0030198_extracellularmatrixo
geneIds

## Sheet: GO0043062_extracellularstructu
geneIds

## Sheet: GO0050808_synapseorganization
geneIds

## Sheet: GO0001525_angiogenesis
geneIds

## Sheet: GO0061564_axondevelopment
geneIds

## Sheet: GO0040017_positiveregulationof
geneIds

## Sheet: GO0072001_renalsystemdevelopme
geneIds

## Sheet: GO0001822_kidneydevelopment
geneIds

## Sheet: GO2000147_positiveregulationof
geneIds

## Sheet: GO0007409_axonogenesis
geneIds

[truncated: 471 more sheets: GO0051272_positiveregulationof, GO0003012_musclesystemprocess, GO0001655_urogenitalsystemdeve, GO0030335_positiveregulationof, GO0019932_second-messenger-med, GO0007416_synapseassembly, GO0051963_regulationofsynapsea, GO0009612_responsetomechanical, GO0072073_kidneyepitheliumdeve, GO0007411_axonguidance, GO0048568_embryonicorgandevelo, GO0097485_neuronprojectionguid, GO0050673_epithelialcellprolif, GO0035239_tubemorphogenesis, GO0048562_embryonicorganmorpho, GO0001501_skeletalsystemdevelo, GO0048839_innereardevelopment, GO0051965_positiveregulationof, GO0007215_glutamatereceptorsig, GO0072006_nephrondevelopment …]
