# Supplementary material for: GATA3 Promotes the Neural Progenitor State but Not Neurogenesis in 3D Traumatic Injury Model of Primary Human Cortical Astrocytes
Source: Front Cell Neurosci. 2019 Feb 11;13:23. doi: 10.3389/fncel.2019.00023 (PMC6380212; doi:10.3389/fncel.2019.00023)
Supplement: DATASET S4 — GO-term analyses for GATA3-expressing and scratched pHAs versus EGFP-expressing and scratched pHAs in 2D cultures. [file Data_Sheet_4.ZIP › GO_term_analyses_GATA3s_vs_GFPs/clusterProfiler/CP_CC_genes.xlsx]

## Sheet: GO0005578_proteinaceousextrace
geneIds

## Sheet: GO0098794_postsynapse
geneIds

## Sheet: GO0097060_synapticmembrane
geneIds

## Sheet: GO0044297_cellbody
geneIds

## Sheet: GO0043235_receptorcomplex
geneIds

## Sheet: GO0032279_asymmetricsynapse
geneIds

## Sheet: GO0043025_neuronalcellbody
geneIds

## Sheet: GO0014069_postsynapticdensity
geneIds

## Sheet: GO0045211_postsynapticmembrane
geneIds

## Sheet: GO0034702_ionchannelcomplex
geneIds

[truncated: 38 more sheets: GO0030425_dendrite, GO0034703_cationchannelcomplex, GO0005788_endoplasmicreticulum, GO0005604_basementmembrane, GO0030424_axon, GO1902495_transmembranetranspo, GO0005581_collagentrimer, GO0045121_membraneraft, GO0098857_membranemicrodomain, GO0043204_perikaryon, GO0030666_endocyticvesiclememb, GO0031091_plateletalphagranule, GO0005911_cell-celljunction, GO0098793_presynapse, GO0008328_ionotropicglutamater, GO0008305_integrincomplex, GO0048786_presynapticactivezon, GO0030139_endocyticvesicle, GO0044304_mainaxon, GO0043292_contractilefiber …]
