# Supplementary material for: GATA3 Promotes the Neural Progenitor State but Not Neurogenesis in 3D Traumatic Injury Model of Primary Human Cortical Astrocytes
Source: Front Cell Neurosci. 2019 Feb 11;13:23. doi: 10.3389/fncel.2019.00023 (PMC6380212; doi:10.3389/fncel.2019.00023)
Supplement: DATASET S4 — GO-term analyses for GATA3-expressing and scratched pHAs versus EGFP-expressing and scratched pHAs in 2D cultures. [file Data_Sheet_4.ZIP › GO_term_analyses_GATA3s_vs_GFPs/clusterProfiler/CP_MF_genes.xlsx]

## Sheet: GO0005539_glycosaminoglycanbin
geneIds

## Sheet: GO0050840_extracellularmatrixb
geneIds

## Sheet: GO0005518_collagenbinding
geneIds

## Sheet: GO0048018_receptorligandactivi
geneIds

## Sheet: GO0019838_growthfactorbinding
geneIds

## Sheet: GO0005216_ionchannelactivity
geneIds

## Sheet: GO0005178_integrinbinding
geneIds

## Sheet: GO0008083_growthfactoractivity
geneIds

## Sheet: GO0015267_channelactivity
geneIds

## Sheet: GO0022803_passivetransmembrane
geneIds

[truncated: 31 more sheets: GO0008201_heparinbinding, GO0001664_G-proteincoupledrece, GO0005201_extracellularmatrixs, GO0017147_Wnt-proteinbinding, GO0042277_peptidebinding, GO0005261_cationchannelactivit, GO0033218_amidebinding, GO0048407_platelet-derivedgrow, GO0005520_insulin-likegrowthfa, GO0042043_neurexinfamilyprotei, GO0005125_cytokineactivity, GO0005109_frizzledbinding, GO0071813_lipoproteinparticleb, GO0015179_L-aminoacidtransmemb, GO0015171_aminoacidtransmembra, GO0015175_neutralaminoacidtran, GO0015276_ligand-gatedionchann, GO0008509_aniontransmembranetr, GO0019955_cytokinebinding, GO0001968_fibronectinbinding …]
