# Supplementary material for: GATA3 Promotes the Neural Progenitor State but Not Neurogenesis in 3D Traumatic Injury Model of Primary Human Cortical Astrocytes
Source: Front Cell Neurosci. 2019 Feb 11;13:23. doi: 10.3389/fncel.2019.00023 (PMC6380212; doi:10.3389/fncel.2019.00023)
Supplement: DATASET S4 — GO-term analyses for GATA3-expressing and scratched pHAs versus EGFP-expressing and scratched pHAs in 2D cultures. [file Data_Sheet_4.ZIP › GO_term_analyses_GATA3s_vs_GFPs/GOSeq/GOSeq_keggGenes_GATA3c_vs_GFPc.xlsx]

## Sheet: hsa00230
geneIds

## Sheet: hsa02010
geneIds

## Sheet: hsa04010
geneIds

## Sheet: hsa04080
geneIds

## Sheet: hsa04144
geneIds

## Sheet: hsa04145
geneIds

## Sheet: hsa04260
geneIds

## Sheet: hsa04270
geneIds

## Sheet: hsa04310
geneIds

## Sheet: hsa04340
geneIds

[truncated: 34 more sheets: hsa04350, hsa04360, hsa04510, hsa04512, hsa04514, hsa04530, hsa04540, hsa04610, hsa04612, hsa04650, hsa04670, hsa04730, hsa04810, hsa04916, hsa04940, hsa04970, hsa04974, hsa04976, hsa05020, hsa05146 …]
