# Supplementary material for: GATA3 Promotes the Neural Progenitor State but Not Neurogenesis in 3D Traumatic Injury Model of Primary Human Cortical Astrocytes
Source: Front Cell Neurosci. 2019 Feb 11;13:23. doi: 10.3389/fncel.2019.00023 (PMC6380212; doi:10.3389/fncel.2019.00023)
Supplement: DATASET S4 — GO-term analyses for GATA3-expressing and scratched pHAs versus EGFP-expressing and scratched pHAs in 2D cultures. [file Data_Sheet_4.ZIP › GO_term_analyses_GATA3s_vs_GFPs/topGO/topGO_BP_elimfisher_genes.xlsx]

## Sheet: GO0007399_nervoussystemdevelop
geneIds

## Sheet: GO0007166_cellsurfacereceptors
geneIds

## Sheet: GO0022008_neurogenesis
geneIds

## Sheet: GO0007155_celladhesion
geneIds

## Sheet: GO0030182_neurondifferentiatio
geneIds

## Sheet: GO0007267_cell-cellsignaling
geneIds

## Sheet: GO0030198_extracellularmatrixo
geneIds

## Sheet: GO0009605_responsetoexternalst
geneIds

## Sheet: GO0048666_neurondevelopment
geneIds

## Sheet: GO0000902_cellmorphogenesis
geneIds

[truncated: 1,024 more sheets: GO0031175_neuronprojectiondeve, GO0000904_cellmorphogenesisinv, GO0048468_celldevelopment, GO0048812_neuronprojectionmorp, GO0072358_cardiovascularsystem, GO0001944_vasculaturedevelopme, GO0048667_cellmorphogenesisinv, GO0050808_synapseorganization, GO0007268_chemicalsynaptictran, GO0045597_positiveregulationof, GO0001525_angiogenesis, GO0061564_axondevelopment, GO0040017_positiveregulationof, GO0001822_kidneydevelopment, GO0042127_regulationofcellprol, GO0007409_axonogenesis, GO0030335_positiveregulationof, GO0098609_cell-celladhesion, GO0048589_developmentalgrowth, GO0007416_synapseassembly …]
